# Supplementary material for: Analyzing bed and width oscillations in a self-maintained gravel-cobble bedded river using geomorphic covariance structures
Source: Copernicus journal article supplement (doi:10.5194/esurf-2015-49), 2016-02-05
Supplement: Supplementary file 1 [file esurf-2015-49-supplement.pdf]

1 **Supplemental materials**

2

3 **1 Introduction Supplements**

4 None.

5

6 **2 Experimental Design Supplements**

7 None.

8 **3 Study Area Supplements**

9 None.

10 **4 Methods Supplements**

11 *4.1 Physical data information*

12 Topographic data came from airborne LiDAR scanning (excluding Timbuctoo Bend) at  
13 flows ~ 10–16% of bankfull discharge plus thorough in-water mapping using total stations and  
14 RTK GPSs as well as boat-based bathymetry mapping with a single-beam echosounder  
15 coupled to an RTK GPS and professional hydrographic software (Pasternack, 2009). Essential  
16 quantitative information describing topographic and bathymetric data are reported in the box  
17 below.

18

| Attribute                | Description                                                                                                                                                                                                               |
|--------------------------|---------------------------------------------------------------------------------------------------------------------------------------------------------------------------------------------------------------------------|
| Years of data collection | June–December 2006                                                                                                                                                                                                        |
| Bathymetric Resolution   | Within the 880 cfs inundation area, points were collected along longitudinal lines, cross-sections, and on ~10'x10' grids, yielding an average grid point spacing of one point every 6.2 ft. (28 pts/100m <sup>2</sup> ). |
| Topographic Resolution   | Outside the 880 cfs inundation area, points were collected on a grid, yielding an average grid point spacing of one point every 9.7 ft. (11.4 pts/100m <sup>2</sup> ).                                                    |
| Bathymetric Accuracy     | Comparison of overlapping echosounder and total station survey points yielded observed differences of 0.2-0.3'.                                                                                                           |

|                      |                                                                              |
|----------------------|------------------------------------------------------------------------------|
| Topographic Accuracy | Regular total station control point checks yielded accuracies of 0.03-0.06'. |
|----------------------|------------------------------------------------------------------------------|

19

20 *4.2 2D hydrodynamic modeling details*

21 The surface-water modeling system (SMS; Aquaveo, LLC, Provo, UT) user interface and  
 22 sedimentation and river hydraulics–two-dimensional algorithm (Lai, 2008) were used to produce  
 23 these 2D hydrodynamic models of the LYR with internodal mesh spacing of 0.91–1.5 m  
 24 according to the procedures of Pasternack (2011). SRH-2D is a 2D finite-volume model that  
 25 solves the Saint Venant equations for depth and velocity at each computational node, and  
 26 supports a hybrid structured-unstructured mesh that can use quadrilateral and triangular  
 27 elements of any size, thus allowing for mesh detail comparable to finite-element models. A  
 28 notable aspect of the modeling was the use of spatially distributed and stage-dependent  
 29 vegetated boundary roughness (Katul et al., 2002; Casas et al., 2010). Model simulations were  
 30 comprehensively validated for flows ranging over an order of magnitude of discharge (0.1 to 1.0  
 31 times bankfull) using three approaches: (i) traditional cross-sectional validation methods, (ii)  
 32 comparison of LiDAR-derived water surface returns against modeled water surface elevations,  
 33 and (iii) Lagrangian particle tracking with RTK GPS to assess the velocity vectors (Barker,  
 34 2011). Note that TBR was originally a subset model domain of the Lower Yuba River (LYR),  
 35 while model performance is reported for the entire river. Model set-up and performance details  
 36 are reported in the box below:

37

| Attribute                        | Description                                                                                                                                                 |
|----------------------------------|-------------------------------------------------------------------------------------------------------------------------------------------------------------|
| Computational Mesh Resolution    | For Q<5,000 cfs, 3' internodal spacing. As flow goes overbank, cell size increases to 6'. For flows >21,100 cfs, different mesh has 10' internodal spacing. |
| Discharge Range of Model         | 300 to 110,400 cfs                                                                                                                                          |
| Downstream WSE data/model source | Direct observation of WSE at a limited number of flows <~12,000 cfs. For higher flows the downstream WSE was taken as the upstream WSE from the HR model    |

|                                                 |                                                                                                                                                                                                                                                                                                                                                                                                                                                                                                                                                   |
|-------------------------------------------------|---------------------------------------------------------------------------------------------------------------------------------------------------------------------------------------------------------------------------------------------------------------------------------------------------------------------------------------------------------------------------------------------------------------------------------------------------------------------------------------------------------------------------------------------------|
|                                                 | at that flow.                                                                                                                                                                                                                                                                                                                                                                                                                                                                                                                                     |
| River roughness specification                   | Because the scientific literature reports no consistent variation of Manning's n as a function of stage-dependent relative roughness or the whole wetted area of a river (i.e., roughness/depth), a constant value was used for all unvegetated sediment with 0.03 for TBR (based on preliminary testing in 2008-2009). For vegetated terrain, the Casas et al. (2010) algorithm was used to obtain a spatially distributed, flow-dependent surface roughness for each model cell on the basis of the ratio of local canopy height to flow depth. |
| Eddy viscosity specification                    | Parabolic turbulence closure with an eddy velocity that scales with depth, shear velocity, and a coefficient ( $e_0$ ) that can be selected between ~0.05 to 0.8 based on expert knowledge and local data indicators.<br>$Q < 10,000$ cfs: $e_0 = 0.6$<br>$Q \geq 10,000$ cfs: $e_0 = 0.1$                                                                                                                                                                                                                                                        |
| Hydraulic Validation Range                      | Point observations of WSE were primarily collected at 880 cfs, with some observations during higher flows, but not systematically analyzed. Velocity observations were collected for flows ranging from 530-5,010 cfs. Cross-sectional validation data collected at 800 cfs.                                                                                                                                                                                                                                                                      |
| Model mass conservation (Calculated vs Given Q) | 0.001 to 1.98 %                                                                                                                                                                                                                                                                                                                                                                                                                                                                                                                                   |
| WSE prediction accuracy                         | At 880 cfs there are 197 observations. Mean raw deviation is -0.006'. 27% of deviations within 0.1', 49% of deviations within 0.25', 70% within 0.5', 94% within 1'. These results are better than the inherent uncertainty in LiDAR obtained topographic and water surface elevations.                                                                                                                                                                                                                                                           |
| Depth prediction accuracy                       | From cross-sectional surveys, predicted vs observed depths yielded a correlation (r) of 0.81.                                                                                                                                                                                                                                                                                                                                                                                                                                                     |
| Velocity magnitude prediction accuracy          | 5780 observations yielding a scatter plot correlation (r) of 0.887. Median error of 16%. Percent error metrics include all velocities (including $V < 3$ ft/s, which tends to have high error percents) yielding a rigorous standard of reporting.                                                                                                                                                                                                                                                                                                |
| Velocity direction prediction accuracy          | 5780 observations yielding a scatter plot correlation (r) of 0.892. Median error of 4%. Mean error of 6%. 61% of deviations within 5 deg and 86% of deviations within 10 deg.                                                                                                                                                                                                                                                                                                                                                                     |

38

39           Using the workflow of Pasternack (2011), SRH-2D model outputs were processed to  
40 produce rasters of depth and velocity within the wetted area for each discharge. The first task  
41 involved creating the wetted area polygon for each discharge. To do this, depth results were first  
42 converted to triangular irregular networks (TIN) and then to a series of 0.9144-m hydraulic raster

43 files. Depth cells greater than zero were used to create a wetted area boundary applied to all  
44 subsequent hydraulic rasters. Next, the SRH-2D hydraulic outputs for depth and depth-  
45 averaged velocity were converted from point to TIN to raster files within ArcGIS 10.1 staying  
46 within the wetted area for each discharge. The complete dataset was a series of 0.9144-m  
47 resolution hydraulics rasters derived from SRH-2D hydrodynamic flow simulations at the  
48 following discharges: 8.5, 9.9, 11.3, 12.7, 15.0, 17.0, 17.6, 19.8, 22.7, 24.9, 26.3, 28.3, 36.8,  
49 42.5, 48.1, 56.6, 70.8, 85.0, 113.3, 141.6, 212.4, 283.2, 424.8, 597.5, 849.5, 1195.0, 2389.9,  
50 and 3126.2 m<sup>3</sup>/s.

51 Despite best efforts with modern technology and scientific methods, the 2D models used  
52 in this study have uncertainties and errors. Previously it has been reported that 2D models tend  
53 to underrepresent the range of hydraulic heterogeneity that likely exists due to insufficient  
54 topographic detail and overly efficient lateral transfer of momentum (Pasternack et al., 2004;  
55 MacWilliams et al., 2006). For this study those deficiencies result in a conservative outcome,  
56 such that there could be more fine details to the sizes and shapes of peak velocity patches than  
57 what is revealed herein. Overall, this study involves model-based scientific exploration with  
58 every effort made to match reality at near-census resolution over tens of km of river length given  
59 current technology, but recognizing that current models do have uncertainties.

60

## 61 **Supplemental References**

- 62 Barker, J.R., 2011. Rapid, abundant velocity observation to validate million-element 2D  
63 hydrodynamic models. (M.S. Thesis) University of California at Davis, Davis, CA.
- 64 Casas, A., Lane, S.N., Yu, D., Benito, G., 2010. A method for parameterising roughness and  
65 topographic sub-grid scale effects in hydraulic modelling from LiDAR data. *Hydrology  
66 and Earth System Sciences*. 14(8), pp.1567-1579.
- 67 Katul, G., Wiberg, P., Albertson, J., Hornberger, G., 2002. A mixing layer theory for flow  
68 resistance in shallow streams. *Water Resources Research*, 38(11), 8.
- 69 Lai, Y.G., 2008. SRH-2D version 2: Theory and User's Manual. In: B.o.R. U.S. Department of  
70 Interior (Ed.), *Sedimentation and river hydraulics – two-dimensional river flow modeling*,  
71 Denver, CO.
- 72 MacWilliams, M.L., Wheaton, J.M., Pasternack, G.B., Kitanidis, P.K., Street, R.L., 2006. The  
73 flow-convergence routing hypothesis for riffle–pool maintenance in alluvial rivers. *Water  
74 Resour. Res.* 42, W10427. <http://dx.doi.org/10.1029/2005WR004391>.

75 Pasternack, G.B., 2009. Specific sampling protocols and procedures for topographic mapping.  
76 Prepared for the Lower Yuba River Accord Planning Team, Davis, CA.  
77 Pasternack, G.B., 2011. 2D Modeling and Ecohydraulic Analysis. Createspace, Seattle, WA.  
78 Pasternack, G.B., Tu, D., Wyrick, J.R., 2014. Chinook adult spawning physical habitat of the  
79 lower Yuba River, Prepared for the Yuba Accord River Management Team. University of  
80 California, Davis, CA.  
81 Pasternack, G. B., Wang, C. L., and Merz, J. 2004. Application of a 2D hydrodynamic model to  
82 reach-scale spawning gravel replenishment on the lower Mokelumne River, California.  
83 River Research and Applications 20:2:205-225.  
84
